# Supplementary material
Source: publisher figshare collection journal article supplement (https://geolsoc.figshare.com/articles/dataset/_/3454031)

## Reversal tests for sites BA, GE18 and BG

**a**

site BA

|   | N | dec   | inc   | k    | a95  | Rsum  |
|---|---|-------|-------|------|------|-------|
| 1 | 9 | 182.8 | -60.1 | 13.1 | 14.8 | 8.389 |
| 2 | 5 | 209.2 | -48.5 | 19.4 | 17.8 | 4.794 |

Common KAPPA accepted:  $K_{est} = 14.69$   
 Common KAPPA, but SIMULATION has been chosen

$\gamma = 19.1 < \gamma_c = 21.0$  [ $P\%(>G) = 7.7$ ]  
 Classification = INDETERMINATE

**b**

site GE18

|   | N  | dec   | inc   | k    | a95  | Rsum   |
|---|----|-------|-------|------|------|--------|
| 1 | 18 | 147.2 | -37.7 | 25.8 | 6.9  | 17.341 |
| 2 | 4  | 337.2 | 36.7  | 30.2 | 17.0 | 3.901  |

Common KAPPA accepted:  $K_{est} = 26.38$   
 Common KAPPA, but SIMULATION has been chosen

$\gamma = 8.0 < \gamma_c = 16.4$  [ $P\%(>G) = 42.3$ ]  
 Classification = C

**c**

site BG

|   | N  | dec   | inc   | k    | a95 | Rsum   |
|---|----|-------|-------|------|-----|--------|
| 1 | 7  | 16.0  | 28.5  | 90.4 | 6.4 | 6.934  |
| 2 | 12 | 194.2 | -30.7 | 96.2 | 4.4 | 11.886 |

Common KAPPA accepted:  $K_{est} = 94.07$   
 Common KAPPA, but SIMULATION has been chosen

$\gamma = 2.7 < \gamma_c = 7.2$  [ $P\%(>G) = 63.0$ ]  
 Classification = B

### d Within-site fold test GE09

After correction for tilt of fold axis

100% Tilt adjusted

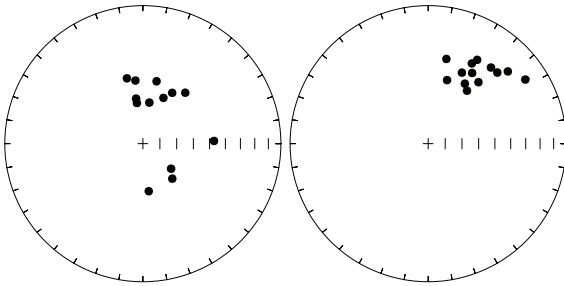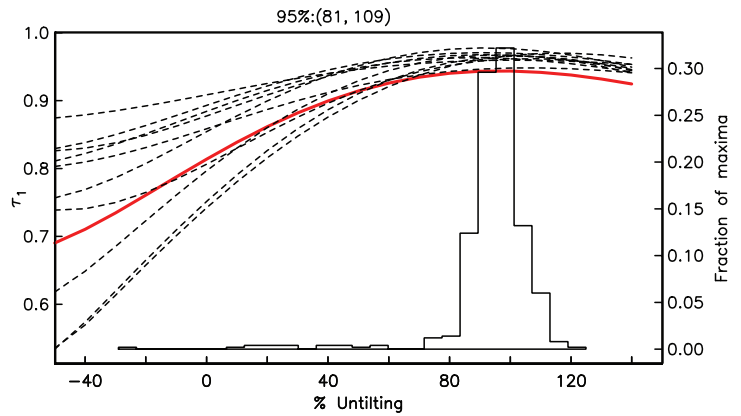

### e Fold test GE07 & GE08

Geographic coordinates

100% Tilt adjusted

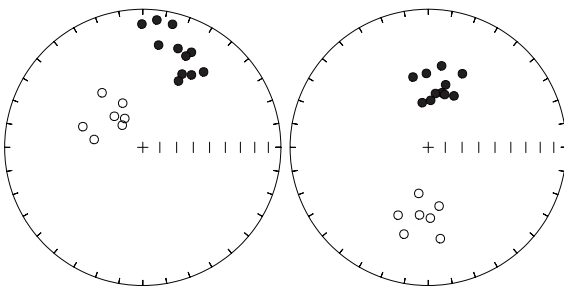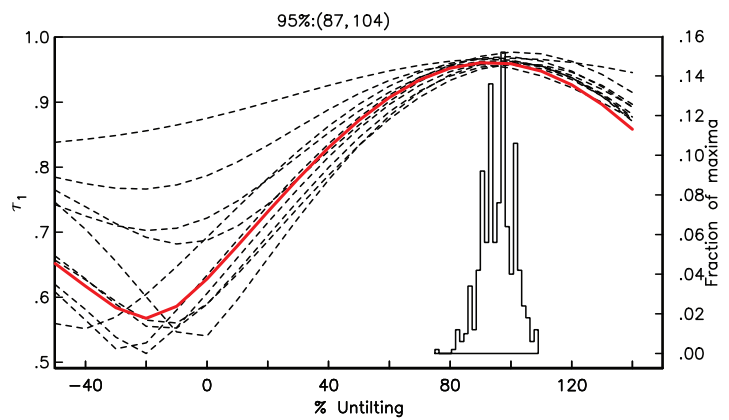

Supplement: Supplementary file 4 [file 1]
